# Supplementary material for: Identification of Candidate Genomic Regions for Chicken Egg Production Traits Based on Genome Wide Association Study
Source: Research Square preprint supplement (doi:10.21203/rs.3.rs-148037/v1), 2021-01-27
Supplement: Supplementary file 5 [file 44ed263b4359b6db88e723a3.xlsx]

## Sheet: Sheet1
Table 3: Details for 32 candidate genes that influence reproductive traits in different ways.
Ways impacting reproductive traits	Genes
Regulating hormone level	NELL2, AQP1, AZIN1, POU3F2, POLR2C, GPR83L, ENSGALG00000038728, RYR3, ITPR1, CNTFR
Influencing the formation, growth, development of follicle	LRIG3, KITLG, PCDH17, GHRHR, ADGRL3, CCDC88C, YY1, CSNK2A2, POLR2C, ITPR1, SMURF2, AGO1, CHIA, DAZAP1, DIRAS1, MUSK, CAMK4
Influencing the development of the reproductive system	WDR25, ENSGALG00000029896, ENSGALG00000039201, GAMT, DAZAP1, ENSGALG00000005652, SLC39A3, HYDIN
