# Supplementary material for: Identification of Candidate Genomic Regions for Chicken Egg Production Traits Based on Genome Wide Association Study
Source: Research Square preprint supplement (doi:10.21203/rs.3.rs-148037/v1), 2021-01-27
Supplement: Supplementary file 6 [file 79528c32443e072a981fd13e.xlsx]

## Sheet: Sheet1
Table 1: Summary of phenotypic data.
Group	Breeds	Abbreviation	Sample size	Totalb
High productivity	White Leghorna	WL	100	220
	Dwarfc	DW	60
	Rhode Island Redd	RIR	60
low productivity	Beijing Youe	BY	42	222
	Henan Gamef	HN	13
	Xishuangbanna Gameg	XS	10
	Turpanh	TU	11
	Zhangzhou Gamei	ZZ	10
	Luxi Gamej	LX	10
	Tibetank	TB	42
	Hongshanl	HS	42
	Taihe Silkiesm	SK	42
Total	-	-	-	442
a White Leghorn came from two different groups. Among them, 40 samples obtained from the Experimental Chicken Farm at the China Agricultural University, 60 samples obtained from Beijing Yanqing Commercial Layer Breeding Company. Their abbreviations are WL_CAU and WL_YQ, respectively.
b Regarding the sample size, we tried to make the ratio between case and control was 1:1 to avoid the large number difference between the two groups interfering the results.
c Dwarf chickens obtained from Beijing Yanqing Commercial Layer Breeding Company.
d Rhode Island Red obtained from Beijing.
e Beijing You chickens obtained from Beijing.
f Henan Game obtained from Henan province.
g Xishuangbanna Game obtained from Xishuangbanna, Yunnan province.
h Turpan obtained from Turpan, Xinjiang.
i Zhangzhou Game obtained from Fujiang province.
j Luxi Game obtained from Shandong province.
k Tibetan obtained from four different places, including the Experimental Chicken Farm at the China Agricultural University, Nimu, Tibet, Naidong, Tibet and Lingzhi, Tibet.
l Hongshan chickens obtained from Hubei province.
m Taihe Silkies chickens obtained from the Experimental Chicken Farm at the China Agricultural University
