# Supplementary material for: Identification of Candidate Genomic Regions for Chicken Egg Production Traits Based on Genome Wide Association Study
Source: Research Square preprint supplement (doi:10.21203/rs.3.rs-148037/v1), 2021-01-27
Supplement: Supplementary file 7 [file a9e5f1531efad3de44cb0028.xlsx]

## Sheet: Title page
Identification of candidate genomic regions for chicken egg production traits based on genome wide association study
Xiurong Zhao1, Changsheng Nie1, Jinxin Zhang1, Xinghua Li1, Tao Zhu1, Zi Guan1, Yu Chen2, Liang Wang2, XueZe Lv2, Weifang Yang2, Yaxiong Jia3, Zhonghua Ning1, Haiying Li4, Changqing Qu5, Huie Wang6,7, Lujiang Qu*1
Address: 1State Key Laboratory of Animal Nutrition, Department of Animal Genetics and Breeding, National Engineering Laboratory for Animal Breeding, College of Animal Science and Technology, China Agricultural University, Beijing 100193, China, 2Beijing Municipal General Station of Animal Science, Beijing 100107, China, 3Institute of Animal Sciences, Chinese Academy of Agricultural Sciences, Beij…
Email: Xiurong Zhao - 1602978784@qq.com; Changsheng Nie - changshengnie@cau.edu.cn; Jinxin Zhang - 1599436449@qq.com; Xinghua Li - 920230688@qq.com; Tao Zhu - zhutao@cau.edu.cn; Zi Guan - atqfgcsh@163.com; Yu Chen - chenyu.cncn@163.com; Liang Wang - wangliangcau@139.com; XueZe Lv - lvxueze0310@163.com; Weifang Yang - carspstp@126.com; Yaxiong Jia - jiayaxiong@caas.cn; Zhonghua Ning - ningzhh@cau.…
* Corresponding author

## Sheet: Additional file 1
Table S1 Genome-wide SNPs associated with reproductive traits.
SNP ID	Chrosome	Posistion	P vaule	Nearest gene
AX-76288641	0	0	2.00714e-06	NA
AX-75424481	1	30418287	2.69408e-07	NELL2
AX-75424489	1	30420285	7.68657e-06	NELL2
AX-75427140	1	31722672	1.801e-06	LRIG3
AX-75448176	1	41739240	3.61911e-09	TSPAN19
AX-75450814	1	43099910	4.51901e-07	KITLG
AX-75480153	1	56943004	5.04207e-06	DENND2A
AX-75486162	1	59769134	1.0955e-06	TMTC1
AX-75488430	1	60860595	2.9055e-06	ERC1
AX-75499001	1	65863432	2.52418e-06	ENSGALG00000046127
AX-75534946	1	84258369	7.79938e-06	COL8A1
AX-80890167	1	85607083	8.19336e-07	ZPLD1
AX-75541864	1	87582860	4.72916e-07	KIAA1524
AX-75541873	1	87587117	4.72916e-07	KIAA1524
AX-75541963	1	87635530	1.29572e-08	SH2D1B
AX-75555852	1	94282354	1.11635e-09	NA
AX-75556507	1	94635065	2.0345e-09	NA
AX-75225234	1	117592688	5.78555e-07	ENSGALG00000036169
AX-75267293	1	137257398	1.30611e-07	TMEM255B
AX-75320912	1	163473561	2.16582e-06	PCDH17
AX-75322789	1	164447820	2.13049e-06	ENSGALG00000034638
AX-75322810	1	164459138	1.37535e-06	ENSGALG00000034638
AX-75965321	2	1068425	2.52072e-08	MINDY4, AQP
AX-75993000	2	1215757	6.42042e-06	GHRHR
AX-75996755	2	1234625	3.13321e-07	GHRHR
AX-76053674	2	20576504	2.35012e-06	FAM171A1
AX-80779498	2	46145450	1.8831e-06	TRANK1
AX-76152312	2	76468530	5.85395e-07	ANKH
AX-76003273	2	129831827	5.33404e-08	AZIN1
AX-76003319	2	129851863	1.54633e-06	AZIN1
AX-76410884	3	10971427	3.12315e-06	ETAA1
AX-76417317	3	13012723	1.58613e-06	NA
AX-76536054	3	69621540	2.42463e-07	NA
AX-76536071	3	69628923	1.5932e-06	NA
AX-76536096	3	69655624	4.14264e-06	NA
AX-76536308	3	69762163	5.02181e-06	NA
AX-76540844	3	72000979	5.65482e-07	POU3F2, FBXL4
AX-76541349	3	72227940	9.77647e-07	ENSGALG00000034564
AX-76541394	3	72243677	7.32342e-06	ENSGALG00000034564
AX-76541486	3	72303465	2.2345e-06	ENSGALG00000034564
AX-76541488	3	72304623	1.31863e-06	ENSGALG00000034564
AX-76401421	3	106014658	2.40329e-06	NCOA1
AX-76624455	4	141350	1.78053e-06	MSN
AX-76630762	4	173004	4.71498e-07	MSN
AX-76645558	4	249014	3.49264e-06	ENSGALG00000044799
AX-76652327	4	283517	1.21884e-06	HEPH, HSF3
AX-76658977	4	319076	1.93739e-06	HEPH, GPR83L
AX-76662643	4	338418	1.02015e-06	GPR83L, ENSGALG00000038728
AX-80823531	4	394383	1.50585e-06	NA
AX-76676155	4	408469	4.71498e-07	NA
AX-76714260	4	612204	3.22705e-06	ENSGALG00000029764
AX-76718681	4	634832	2.09492e-06	ENSGALG00000029764
AX-76675026	4	48646624	1.82291e-06	ADGRL3
AX-76709631	4	65674981	1.63717e-10	KIT
AX-76713110	4	67434214	4.37472e-06	ENSGALG00000041624, GABRA2, GABRA4
AX-76715084	4	68430908	4.08611e-06	GRXCR1
AX-76776179	5	1133440	1.51675e-07	LUZP2
AX-76806561	5	26655630	5.87272e-11	ENSGALG00000033973
AX-76814849	5	30327067	3.25945e-06	RYR3
AX-76845554	5	44381627	3.63247e-06	CCDC88C, PPP4R3A
AX-76855266	5	48607009	3.71906e-06	YY1
AX-76855305	5	48622650	1.27689e-06	SLC25A29, YY1
AX-76855335	5	48635048	1.45467e-06	SLC25A29
AX-76855457	5	48687658	3.62173e-07	WDR25
AX-76855519	5	48714129	6.07512e-06	WDR25
AX-76855557	5	48731601	9.55913e-12	WDR25
AX-76855561	5	48733361	3.3294e-08	WDR25
AX-76855583	5	48739609	5.28628e-12	BEGAIN
AX-76855593	5	48745253	5.31336e-18	BEGAIN
AX-76855630	5	48762022	6.50736e-08	BEGAIN
AX-76855665	5	48778313	4.2176e-07	BEGAIN
AX-76855684	5	48786534	9.28332e-18	BEGAIN
AX-76855699	5	48792877	1.39646e-18	BEGAIN
AX-76855705	5	48795578	1.94251e-12	BEGAIN
AX-76855726	5	48804374	2.30667e-06	BEGAIN
AX-80949259	5	48808664	1.61134e-06	BEGAIN
AX-76855747	5	48811664	9.01785e-10	BEGAIN
AX-76855766	5	48820492	5.53966e-13	BEGAIN
AX-76855815	5	48838402	2.48026e-12	BEGAIN
AX-76855817	5	48839325	5.7555e-12	BEGAIN
AX-76864957	5	52414840	5.67705e-06	NA
AX-76900556	6	13775431	4.0853e-06	KCNMA1
AX-76900629	6	13799359	6.3643e-06	KCNMA1
AX-76914014	6	19118336	7.54713e-09	TMEM72
AX-76930453	6	25657784	6.93509e-06	NA
AX-76943077	6	30466599	5.6214e-06	NA
AX-76944573	6	31031659	7.78791e-08	ENSGALG00000033285
AX-76952045	6	33728812	1.90029e-06	NA
AX-80860981	7	8304966	1.92632e-08	TMEFF2
AX-77011457	7	25213170	5.4414e-06	NA
AX-77014656	7	26516128	6.78353e-06	SLC15A2, IQCB1
AX-77025318	7	30491355	2.36937e-09	TMEM163
AX-77108458	8	3617571	1.32438e-07	RGS1, RGS2, RGS13
AX-77113953	8	5896668	1.4805e-06	XPR1
AX-77106132	8	29777765	9.50077e-08	LHX8, TYW3
AX-77150939	9	19409166	1.08723e-07	FNDC3B
AX-75619037	10	7302581	5.05493e-08	TCF12, CGNL1
AX-75660603	11	445721	3.26204e-07	CSNK2A2
AX-75665353	11	607645	1.34266e-07	POLR2C
AX-75643828	11	1608025	2.68157e-06	HYDIN
AX-75644090	11	1618412	7.76034e-06	HYDIN
AX-80948010	11	1754582	4.06948e-06	VAC14
AX-75716772	12	5402523	1.94916e-06	IQSEC1
AX-75724990	12	8188245	6.77632e-06	ERC2
AX-75685213	12	12455744	5.51615e-09	NA
AX-75703508	12	18557458	5.26791e-07	ITPR1
AX-75703529	12	18564932	2.07827e-07	ITPR1
AX-75703541	12	18569966	2.87292e-07	ITPR1
AX-75703548	12	18572141	6.82975e-07	ITPR1
AX-75744414	13	16244175	5.65709e-07	VDAC1
AX-75745363	13	16603463	8.20594e-07	ENSGALG00000029896
AX-75810149	14	8804646	1.25219e-06	OTOA
AX-75810223	14	8826708	8.41003e-07	OTOA
AX-75906835	18	6994110	2.20988e-06	SMURF2
AX-80787269	18	7876592	1.18075e-06	SLC16A6
AX-76227922	20	8585474	4.52311e-06	ENSGALG00000039201, ENSGALG00000005652
AX-80872656	20	13885974	5.46362e-12	NA
AX-76249257	21	4983824	3.25198e-07	KAZN
AX-76249303	21	4996326	6.50896e-08	KAZN
AX-76250675	21	5263523	1.5529e-09	C1orf158, ENSGALG00000021598
AX-76261071	22	1636463	1.27378e-07	DUSP26, TTI2, RNF122
AX-76288938	23	4139841	1.77798e-07	NA
AX-80768216	23	4214468	7.12768e-08	AGO1
AX-76339015	26	3035521	3.58494e-07	NA
AX-76348623	26	5077655	3.82256e-09	TAF8
AX-76348772	26	5100952	1.4924e-08	CHIA
AX-76351954	27	1296472	2.26586e-06	WNT3
AX-76354045	27	1789630	1.06056e-06	GH, RDM1
AX-76379082	28	2980442	4.15129e-06	SBNO2
AX-76379816	28	3170288	3.7302e-06	NA
AX-76379939	28	3197429	1.98001e-06	GAMT, DAZAP1
AX-76380005	28	3210016	6.58746e-07	DAZAP1
AX-76380342	28	3284684	1.57463e-08	SLC39A3
AX-76380390	28	3295475	1.40455e-10	SLC39A3, DIRAS
AX-77265370	63	8262232	1.19267e-06	CNTFR
AX-77269564	63	8523916	4.76389e-23	DNAJB5
AX-77206121	63	24853011	5.81905e-06	NA
AX-77221928	63	41389657	7.4556e-07	DAPK1
AX-77226182	63	46670667	1.47808e-08	CAMK4
AX-77226564	63	46942411	2.19068e-06	NA
AX-77228575	63	49223728	1.22083e-06	NA
AX-77241427	63	58611960	1.02634e-07	MUSK
AX-77252226	63	66675375	4.08026e-07	MUSK
AX-77252227	63	66676347	1.55622e-07	MUSK
AX-77252241	63	66683942	1.8919e-06	MUSK
AX-77252265	63	66694071	8.69468e-09	MUSK
AX-80869954	63	66732038	1.0078e-08	MUSK
AX-77258647	63	70799618	6.48241e-06	TMOD1

## Sheet: Additional file 2
Table S2 Difference of the allele frequencies of the significant SNPs located at 48.61-48.84Mb on chromosome 5 between the high and low productivity groups.
SNP	Group	Alle frequency		χ2(p-vaule)
		C	T
AX-76855266	High	0.325688	0.674312	147.699(<0.01)
	Low	0.893665	0.106335
AX-76855305	High	0.465438	0.534562	114.715(<0.01)
	Low	0.932127	0.0678733
AX-76855335	High	0.488532	0.511468	103.499(<0.01)
	Low	0.926941	0.0730594
AX-76855557	High	0.557604	0.442396	129.256(<0.01)
	Low	0.0570776	0.942922
AX-76855561	High	0.478571	0.521429	126.531(<0.01)
	Low	0.957014	0.0429864
AX-76855665	High	0.461009	0.538991	96.619(<0.01)
	Low	0.89819	0.10181
AX-76855684	High	0.541284	0.458716	130.728(<0.01)
	Low	0.0452489	0.954751
AX-76855699	High	0.541284	0.458716	130.728(<0.01)
	Low	0.0475113	0.952489
AX-76855705	High	0.536866	0.463134	131.921(<0.01)
	Low	0.0429864	0.957014
AX-76855766	High	0.458716	0.541284	111.127(<0.01)
	Low	0.924312	0.0756881
AX-76855815	High	0.543779	0.456221	105.175(<0.01)
	Low	0.0898618	0.910138
SNP	Group	Alle frequency		χ2(p-vaule)
		A	G
AX-76855457	High	0.506912	0.493088	91.886(<0.01)
	Low	0.0904977	0.909502
AX-76855519	High	0.522936	0.477064	78.738(<0.01)
	Low	0.125	0.875
AX-76855593	High	0.541284	0.458716	127.77(<0.01)
	Low	0.0497738	0.950226
AX-76855726	High	0.541284	0.458716	82.854(<0.01)
	Low	0.131222	0.868778
AX-76855747	High	0.458716	0.541284	108.527(<0.01)
	Low	0.918552	0.081448
AX-76855817	High	0.546083	0.453917	75.681(<0.01)
	Low	0.0840909	0.915909
SNP	Group	Alle frequency		χ2(p-vaule)
		A	C
AX-76855583	High	0.444954	0.555046	130.31(<0.01)
	Low	0.945701	0.0542986
AX-76855630	High	0.458716	0.541284	87.148(<0.01)
	Low	0.879545	0.120455
SNP	Group	Alle frequency		χ2(p-vaule)
		A	T
AX-80949259	High	0.444186	0.555814	106.128(<0.01)
	Low	0.906393	0.0936073

## Sheet: Additional file 3
Table S3 Results for comparion with previously reported QTLs. The results show that there are 27 QTLs overlapped with SNPs obtained from this study
Trait	Classification	Chromosome	Position	-log10 (P-value)	SNP ID	Candidate gene	Distancea	QTL	Distanceb
Egg production	Egg number	5	44381627	5.44	AX-76845554	CCDC88C	within	42844981-43189445	1.2
		11	1754582	5.4	AX-80948010	VAC14	within	2417159-2417199	0.66
	Age at first egg	1	117592688	6.24	AX-75225234	ENSGALG00000036169	D0.10	119311759-119311799	1.72
		3	106014658	5.62	AX-76401421	NCOA1	within	106400923-106400963	0.39
		4	67434214	4.37	AX-76713110	ENSGALG00000041624, GABRA2, GABRA4	D0.029	70877750-70877790	3.44
							U0.060
							D0.042
		4	68430908	5.39	AX-76715084	GRXCR1	U0.046	70877750-70877790	2.45
		12	18557458	6.28	AX-75703508	ITPR1	within	15721659-15721699	2.84
		12	18564932	6.68	AX-75703529	ITPR1	within	15721659-15721699	2.84
		12	18569966	6.54	AX-75703541	ITPR1	within	15721659-15721699	2.85
		12	18572141	6.17	AX-75703548	ITPR1	within	15721659-15721699	2.85
	Egg production rate	4	67434214	5.36	AX-76713110	ENSGALG00000041624, GABRA2, GABRA4	D0.029	68540524-69505326	1.11
							U0.060
							D0.042
		4	68430908	5.39	AX-76715084	GRXCR1	U0.046	68540524-69505326	0.11
		13	16603463	6.09	AX-75745363	ENSGALG00000029896	within	16604190-16604230	0.000727
	Ovarian follicle weight	1	65863432	5.6	AX-75499001	ENSGALG00000046127	U0.024	62297345-67819536	1.96
	Small yellow follicle number	4	67434214	5.36	AX-76713110	ENSGALG00000041624, GABRA2, GABRA4	D0.029	68473628-68473668	1.04
							U0.060
							D0.042
		4	68430908	5.39	AX-76715084	GRXCR1	U0.046	68473628-68473668	0.043
		7	26516128	5.17	AX-77014656	SLC15A2	U0.023	27574014-27574054	1.06
						IQCB1	D0.047
Reproduction traits	Ovary weight	1	65863432	5.6	AX-75499001	ENSGALG00000046127	U0.024	62297345-67819536	1.96
		7	25213170	5.26	AX-77011457	NA	NA	66805-35685813	within
		7	26516128	5.17	AX-77014656	SLC15A2	U0.023	66805-35685813	within
						IQCB1	D0.047
		28	2980442	5.38	AX-76379082	SBNO2	within	2442317-2442357	0.54
	Oviduct length	1	164447820	5.67	AX-75322789	ENSGALG00000034638	D0.16	169194229-169194269	4.75
		1	164459138	5.86	AX-75322810	ENSGALG00000034638	D0.17	169194229-169194269	4.74
		2	46145450	5.73	AX-80779498	TRANK1	within	49158318-49158358	3.01
	Oviduct weight	1	164447820	5.67	AX-75322789	ENSGALG00000034638	D0.16	168378161-168378201	3.93
		1	164459138	5.86	AX-75322810	ENSGALG00000034638	D0.17	168378161-168378201	3.92
a The unit is Mb. U and D represent that SNP located upstream and downstream of the gene, respectively.
b The unit is Mb. U and D represent that SNP located upstream and downstream of the gene, respectively.

## Sheet: Additional file 4
Figure S1.The line chart of cross validation error.
The coefficient of variation value for each K-value, the accessions were divided into twenty subgroups (there was minimum K-value when K=12).
