# Supplementary material for: Identification of Candidate Genomic Regions for Chicken Egg Production Traits Based on Genome Wide Association Study
Source: Research Square preprint supplement (doi:10.21203/rs.3.rs-148037/v1), 2021-01-27
Supplement: Supplementary file 8 [file e0a5aa8c3685332f4516755f.xlsx]

## Sheet: Sheet1
Table 2: Genome-wide SNPs around significant peaks associated with reproductive traits.
SNP ID	Chrosome	Posistiona	P vaule	Nearest gene
AX-75424481	1	30418287	2.69408e-07	NELL2
AX-75424489	1	30420285	7.68657e-06	NELL2
AX-75427140	1	31722672	1.801e-06	LRIG3
AX-75448176	1	41739240	3.61911e-09	TSPAN19
AX-75450814	1	43099910	4.51901e-07	KITLG
AX-75499001	1	65863432	2.52418e-06	ENSGALG00000046127
AX-75225234	1	117592688	5.78555e-07	ENSGALG00000036169
AX-75320912	1	163473561	2.16582e-06	PCDH17
AX-75322789	1	164447820	2.13049e-06	ENSGALG00000034638
AX-75322810	1	164459138	1.37535e-06	ENSGALG00000034638
AX-75965321	2	1068425	2.52072e-08	MINDY4, AQP1
AX-75993000	2	1215757	6.42042e-06	GHRHR
AX-75996755	2	1234625	3.13321e-07	GHRHR
AX-76053674	2	20576504	2.35012e-06	FAM171A1
AX-80779498	2	46145450	1.8831e-06	TRANK1
AX-76003273	2	129831827	5.33404e-08	AZIN1
AX-76003319	2	129851863	1.54633e-06	AZIN1
AX-76536054	3	69621540	2.42463e-07	NA
AX-76536071	3	69628923	1.5932e-06	NA
AX-76536096	3	69655624	4.14264e-06	NA
AX-76536308	3	69762163	5.02181e-06	NA
AX-76540844	3	72000979	5.65482e-07	POU3F2, FBXL4
AX-76541349	3	72227940	9.77647e-07	ENSGALG00000034564
AX-76541394	3	72243677	7.32342e-06	ENSGALG00000034564
AX-76541486	3	72303465	2.2345e-06	ENSGALG00000034564
AX-76541488	3	72304623	1.31863e-06	ENSGALG00000034564
AX-76401421	3	106014658	2.40329e-06	NCOA1
AX-76624455	4	141350	1.78053e-06	MSN
AX-76630762	4	173004	4.71498e-07	MSN
AX-76645558	4	249014	3.49264e-06	ENSGALG00000044799
AX-76652327	4	283517	1.21884e-06	HEPH, HSF3
AX-76658977	4	319076	1.93739e-06	HEPH, GPR83L
AX-76662643	4	338418	1.02015e-06	GPR83L, ENSGALG00000038728
AX-80823531	4	394383	1.50585e-06	NA
AX-76676155	4	408469	4.71498e-07	NA
AX-76714260	4	612204	3.22705e-06	ENSGALG00000029764
AX-76718681	4	634832	2.09492e-06	ENSGALG00000029764
AX-76675026	4	48646624	1.82291e-06	ADGRL3
AX-76713110	4	67434214	4.37472e-06	ENSGALG00000041624, GABRA2, GABRA4
AX-76715084	4	68430908	4.08611e-06	GRXCR1
AX-76776179	5	1133440	1.51675e-07	LUZP2
AX-76814849	5	30327067	3.25945e-06	RYR3
AX-76845554	5	44381627	3.63247e-06	CCDC88C, PPP4R3A
AX-76855266	5	48607009	3.71906e-06	YY1, SLC25A29
AX-76855305	5	48622650	1.27689e-06	SLC25A29, YY1
AX-76855335	5	48635048	1.45467e-06	SLC25A29
AX-76855457	5	48687658	3.62173e-07	WDR25
AX-76855519	5	48714129	6.07512e-06	WDR25
AX-76855557	5	48731601	9.55913e-12	WDR25
AX-76855561	5	48733361	3.3294e-08	WDR25
AX-76855583	5	48739609	5.28628e-12	BEGAIN
AX-76855593	5	48745253	5.31336e-18	BEGAIN
AX-76855630	5	48762022	6.50736e-08	BEGAIN
AX-76855665	5	48778313	4.2176e-07	BEGAIN
AX-76855684	5	48786534	9.28332e-18	BEGAIN
AX-76855699	5	48792877	1.39646e-18	BEGAIN
AX-76855705	5	48795578	1.94251e-12	BEGAIN
AX-76855726	5	48804374	2.30667e-06	BEGAIN
AX-80949259	5	48808664	1.61134e-06	BEGAIN
AX-76855747	5	48811664	9.01785e-10	BEGAIN
AX-76855766	5	48820492	5.53966e-13	BEGAIN
AX-76855815	5	48838402	2.48026e-12	BEGAIN
AX-76855817	5	48839325	5.7555e-12	BEGAIN
AX-76900556	6	13775431	4.0853e-06	KCNMA1
AX-76900629	6	13799359	6.3643e-06	KCNMA1
AX-76943077	6	30466599	5.6214e-06	NA
AX-77011457	7	25213170	5.4414e-06	NA
AX-77014656	7	26516128	6.78353e-06	SLC15A2, IQCB1
AX-75660603	11	445721	3.26204e-07	CSNK2A2
AX-75665353	11	607645	1.34266e-07	POLR2C
AX-75643828	11	1608025	2.68157e-06	HYDIN
AX-75644090	11	1618412	7.76034e-06	HYDIN
AX-80948010	11	1754582	4.06948e-06	VAC14
AX-75703508	12	18557458	5.26791e-07	ITPR1
AX-75703529	12	18564932	2.07827e-07	ITPR1
AX-75703541	12	18569966	2.87292e-07	ITPR1
AX-75703548	12	18572141	6.82975e-07	ITPR1
AX-75744414	13	16244175	5.65709e-07	VDAC1
AX-75745363	13	16603463	8.20594e-07	ENSGALG00000029896
AX-75810149	14	8804646	1.25219e-06	OTOA
AX-75810223	14	8826708	8.41003e-07	OTOA
AX-75906835	18	6994110	2.20988e-06	SMURF2
AX-80787269	18	7876592	1.18075e-06	ARSG, SLC16A6
AX-76227922	20	8585474	4.52311e-06	ENSGALG00000039201, ENSGALG00000005652
AX-76249257	21	4983824	3.25198e-07	KAZN
AX-76249303	21	4996326	6.50896e-08	KAZN
AX-76250675	21	5263523	1.5529e-09	C1orf158, ENSGALG00000021598
AX-76288938	23	4139841	1.77798e-07	NA
AX-80768216	23	4214468	7.12768e-08	AGO1
AX-76339015	26	3035521	3.58494e-07	NA
AX-76348623	26	5077655	3.82256e-09	TAF8
AX-76348772	26	5100952	1.4924e-08	CHIA
AX-76379082	28	2980442	4.15129e-06	SBNO2
AX-76379816	28	3170288	3.7302e-06	NA
AX-76379939	28	3197429	1.98001e-06	GAMT, DAZAP1
AX-76380005	28	3210016	6.58746e-07	DAZAP1
AX-76380342	28	3284684	1.57463e-08	SLC39A3
AX-76380390	28	3295475	1.40455e-10	SLC39A3, DIRAS
AX-77265370	63	8262232	1.19267e-06	CNTFR
AX-77206121	63	24853011	5.81905e-06	NA
AX-77226182	63	46670667	1.47808e-08	CAMK4
AX-77226564	63	46942411	2.19068e-06	NA
AX-77228575	63	49223728	1.22083e-06	NA
AX-77252226	63	66675375	4.08026e-07	MUSK
AX-77252227	63	66676347	1.55622e-07	MUSK
AX-77252241	63	66683942	1.8919e-06	MUSK
AX-77252265	63	66694071	8.69468e-09	MUSK
AX-80869954	63	66732038	1.0078e-08	MUSK
a Physical position
